# Supplementary material for: A caged tris(2-pyridylmethyl)amine ligand equipped with a Ctriazole–H hydrogen bonding cavity
Source: Royal Society of Chemistry journal article supplement (doi:10.1039/d2dt00607c), 2022-01-01
Supplement: d2dt00607c1.pdf [file d2dt00607c1.pdf]

## Electronic supplementary information (ESI)

for

### A caged tris(2-pyridylmethyl)amine ligand equipped with a C<sub>triazole</sub>-H hydrogen bonding cavity.

Gege Qiu,<sup>†a,b</sup> Donglin Diao,<sup>†b</sup> Leo Chaussy,<sup>b</sup> Sabine Michaud-Chevallier,<sup>b</sup> A. Jalila Simaan,<sup>b</sup> Paola Nava,<sup>b</sup> Alexandre Martinez,<sup>\*b</sup> and Cédric Colombari<sup>\*b</sup>

<sup>a</sup> College of Chemistry and Chemical Engineering, Yantai University, China.

<sup>b</sup> Aix Marseille Univ, CNRS, Centrale Marseille, iSm2, Marseille, France.

<sup>†</sup> These authors contributed equally to this work.

E-mail: cedric.colombari@univ-amu.fr ; alexandre.martinez@centrale-marseille.fr

#### Table of contents :

|                                                                                                                           |     |
|---------------------------------------------------------------------------------------------------------------------------|-----|
| 1. Chemical and instrumentation.....                                                                                      | S2  |
| Instrumentation .....                                                                                                     | S2  |
| 2. Computational details.....                                                                                             | S2  |
| 2. Experimental procedure and characterisation.....                                                                       | S5  |
| Synthetic procedure for 2. ....                                                                                           | S5  |
| Synthetic procedure for 4. ....                                                                                           | S6  |
| Synthetic procedure for 5. ....                                                                                           | S6  |
| Synthetic procedure for 6. ....                                                                                           | S6  |
| Synthetic procedure for 7. ....                                                                                           | S7  |
| Synthetic procedure for 8. ....                                                                                           | S7  |
| Synthetic procedure for cage Hm-TriA-TPA. ....                                                                            | S7  |
| Synthetic procedure for Zn <sup>II</sup> (Hm-TriA-TPA)(OTf) <sub>2</sub> . ....                                           | S8  |
| Synthetic procedure for Cu <sup>II</sup> (Hm-TriA-TPA)(OTf) <sub>2</sub> . ....                                           | S8  |
| Preparation of the azido complexes Cu <sup>II</sup> (L)(OTf)(N <sub>3</sub> ) (L= Me <sup>3</sup> TPA or Hm-TriA-TPA).... | S8  |
| Single crystal X-ray Diffraction Data .....                                                                               | S9  |
| 3. Supplementary figures.....                                                                                             | S11 |
| 5. Supplementary references.....                                                                                          | S19 |

## 1. Chemical and instrumentation

All reagents were commercial reagent grade and were used without further purification.

Compound **1**,<sup>[S1]</sup> compound **3**,<sup>[S2]</sup>, and the tris((6-methyl-2-pyridyl)methyl)amine ligand **Me<sup>3</sup>TPA**,<sup>[S3]</sup> were obtained according to reported protocols.

### Instrumentation

<sup>1</sup>H NMR and <sup>13</sup>C NMR were recorded on a Bruker Avance III HD 300 MHz and 400MHz spectrometers. <sup>1</sup>H NMR and <sup>13</sup>C NMR chemical shifts  $\delta$  are reported in ppm referenced to the protonated residual solvent signal. ESI-HRMS were performed on a SYNAPT G2 HDMS (Waters) mass spectrometer with API and spectra were obtained with TOF analysis. Measurements were realized with two internal standards. Electrochemical experiments were recorded on a Bio-logic SP-150 potentiostat equipped with EC-Lab software. Cyclic voltammetry experiments were conducted in the presence of NBu<sub>4</sub>PF<sub>6</sub> as supporting electrolyte and using three-electrode setup which consisted of a Pt working electrode (2 mm), a platinum wire counter electrode and an AgCl/Ag reference electrode. The potentials in the text are referred versus Fc<sup>+</sup>/Fc.

## 2. Computational details

Calculations were performed with the TURBOMOLE program package<sup>[S4]</sup> at the Density Functional Theory level (DFT). The PBE0 exchange-correlation functional was employed,<sup>[S5]</sup> together with the empirical dispersion correction D3 (PBE0-D3).<sup>[S6]</sup>

The basis set is of def2-TZVP quality, accompanied with the corresponding auxiliary basis sets, as the resolution of the identity technique was used throughout.<sup>[S7]</sup> Solvent effects were taken into account using the COSMO continuum dielectric model for acetonitrile.<sup>[S8]</sup> Two structures have been taken into account and fully optimized for **Zn<sup>II</sup>(Hm-TriA-TPA)(CH<sub>3</sub>CN)**: the first one displays a C<sub>3</sub> symmetrical environment around the metal center; the second structure was built from the XRD of the **Cu<sup>II</sup>(Hm-TriA-TPA)(OTf)<sub>2</sub>** and presents a distorted coordination sphere on the Zn. The first structure is 15.4 kJ/mol more stable than the second one.

The XYZ coordinates of the more stable conformation follows. The total energy is reported in a.u.

131

Energy = -5160.6603394639

Zn -2.1284981 -1.7875253 -0.9976660

O 4.2953494 -1.5760409 -1.5198675

O 3.6707803 0.3952836 -3.2811023

O -0.0495323 0.0626344 4.8209958

O 1.9213958 -1.7055677 4.2174938

O -0.7202344 4.4729959 -1.6505346

O -1.7475776 4.5375650 0.8630104

N -3.6557225 -3.0685006 -1.7125406

|   |            |            |            |
|---|------------|------------|------------|
| N | -2.2659265 | -3.2778742 | 0.6449966  |
| N | 0.8674306  | -2.9251873 | 0.8939172  |
| N | 0.6239172  | -3.2778935 | -0.3638438 |
| N | 1.7456494  | -3.2320576 | -1.0102556 |
| N | -3.8400097 | -0.3809335 | -1.1849045 |
| N | -2.6693425 | 1.0015810  | 1.4076043  |
| N | -2.8721345 | -0.2746257 | 1.7171724  |
| N | -2.4122590 | -0.4680407 | 2.9127535  |
| N | -1.2459196 | -2.5125119 | -2.9038678 |
| N | -0.0212392 | 0.3922909  | -3.1549152 |
| N | -1.3353390 | 0.5438332  | -3.0293908 |
| N | -1.5800591 | 1.8136776  | -2.9520893 |
| C | -4.3534651 | -3.5868199 | -0.5416043 |
| H | -5.0176470 | -4.4148929 | -0.8063429 |
| H | -4.9774207 | -2.7863311 | -0.1325001 |
| C | -3.3763473 | -4.0111597 | 0.5128601  |
| C | -3.6616960 | -5.0989827 | 1.3225297  |
| H | -4.5729974 | -5.6611363 | 1.1622719  |
| C | -2.7672828 | -5.4444414 | 2.3149025  |
| H | -2.9551766 | -6.2918271 | 2.9628082  |
| C | -1.6222704 | -4.6806904 | 2.4639946  |
| H | -0.8984734 | -4.9113734 | 3.2350787  |
| C | -1.4013047 | -3.6065029 | 1.6196438  |
| C | -0.2002375 | -2.7457859 | 1.8634868  |
| H | -0.5087211 | -1.7020635 | 1.8705193  |
| H | 0.2188894  | -2.9603188 | 2.8442282  |
| C | 2.1677056  | -2.6319705 | 1.0688797  |
| H | 2.5683329  | -2.3500908 | 2.0289063  |
| C | 2.7313189  | -2.8304033 | -0.1683095 |
| C | 4.1397997  | -2.6726783 | -0.6219177 |
| C | 4.2627680  | -0.3078498 | -1.0471312 |
| C | 4.5271377  | 0.0722724  | 0.2603254  |
| H | 4.7905366  | -0.6847397 | 0.9879406  |
| C | 4.4519784  | 1.4035483  | 0.6840516  |
| C | 4.1131453  | 2.3924228  | -0.2416259 |
| C | 3.9211817  | 2.0113344  | -1.5711425 |
| H | 3.7016202  | 2.7612028  | -2.3234138 |
| C | 3.9739458  | 0.6953814  | -1.9851011 |
| C | 4.7707752  | -0.0303895 | -4.0842367 |
| H | 4.3695071  | -0.2270019 | -5.0772827 |
| H | 5.2203086  | -0.9403465 | -3.6826874 |
| H | 5.5237126  | 0.7608122  | -4.1450153 |
| C | -2.9972773 | -4.1267852 | -2.4694926 |
| H | -3.7181252 | -4.7122258 | -3.0479197 |
| H | -2.5183269 | -4.8083240 | -1.7598259 |
| C | -1.9397538 | -3.5577672 | -3.3665607 |
| C | -1.6936298 | -4.1389377 | -4.6001639 |
| H | -2.2948714 | -4.9783063 | -4.9259290 |
| C | -0.6857551 | -3.6250071 | -5.3901453 |

|   |            |            |            |
|---|------------|------------|------------|
| H | -0.4688609 | -4.0508306 | -6.3621493 |
| C | 0.0438519  | -2.5508414 | -4.9101823 |
| H | 0.8486560  | -2.1222287 | -5.4934354 |
| C | -0.2563405 | -2.0201135 | -3.6677232 |
| C | 0.6076545  | -0.9178109 | -3.1374472 |
| C | 0.6039083  | 1.5824341  | -3.1468502 |
| H | 1.6715750  | 1.6708362  | -3.2652278 |
| C | -0.4105006 | 2.4993603  | -3.0129780 |
| C | -0.3626145 | 3.9849638  | -2.9417339 |
| H | 0.6135215  | 4.3572049  | -3.2573172 |
| H | -1.1130163 | 4.4107121  | -3.6073099 |
| C | 0.1501586  | 4.3546772  | -0.6202963 |
| C | 1.5243953  | 4.2087361  | -0.7385323 |
| H | 1.9712303  | 4.1903763  | -1.7244134 |
| C | 2.3618597  | 4.0680086  | 0.3733110  |
| C | 1.8017743  | 4.0895804  | 1.6521236  |
| C | 0.4279287  | 4.3118110  | 1.7652395  |
| H | -0.0310864 | 4.3798316  | 2.7456058  |
| C | -0.4016485 | 4.4282801  | 0.6679749  |
| C | -2.3088922 | 5.8132448  | 0.5565443  |
| H | -3.3753351 | 5.7385148  | 0.7636506  |
| H | -2.1553673 | 6.0669093  | -0.4938749 |
| H | -1.8665793 | 6.5844756  | 1.1938628  |
| C | -4.5275400 | -2.2561291 | -2.5531278 |
| H | -5.4551473 | -2.7836916 | -2.7940517 |
| H | -4.0087307 | -2.0608112 | -3.4966479 |
| C | -4.8240088 | -0.9423668 | -1.8952590 |
| C | -6.0630775 | -0.3465231 | -2.0681089 |
| H | -6.8249884 | -0.8537281 | -2.6464214 |
| C | -6.2979838 | 0.8837181  | -1.4888826 |
| H | -7.2562703 | 1.3764332  | -1.5987421 |
| C | -5.2779692 | 1.4751954  | -0.7634586 |
| H | -5.4164417 | 2.4434526  | -0.2999049 |
| C | -4.0644710 | 0.8227513  | -0.6317602 |
| C | -2.9522252 | 1.5267853  | 0.0823166  |
| H | -2.0513371 | 1.4729639  | -0.5262450 |
| H | -3.1937684 | 2.5808640  | 0.2009364  |
| C | -2.0555973 | 1.6494740  | 2.4129390  |
| H | -1.8290434 | 2.7020603  | 2.3637670  |
| C | -1.8896565 | 0.6921538  | 3.3843641  |
| C | -1.2743475 | 0.7878513  | 4.7358834  |
| H | -1.1467929 | 1.8306986  | 5.0312675  |
| H | -1.9214884 | 0.3097769  | 5.4707288  |
| C | 1.0668898  | 0.5536965  | 4.2333700  |
| C | 1.2929361  | 1.8852968  | 3.9176964  |
| H | 0.5344433  | 2.6207661  | 4.1537303  |
| C | 2.4648502  | 2.3180060  | 3.2878017  |
| C | 3.4533968  | 1.3823805  | 2.9765372  |
| C | 3.2503449  | 0.0564612  | 3.3644067  |

|   |            |            |            |
|---|------------|------------|------------|
| H | 4.0184984  | -0.6863059 | 3.1781767  |
| C | 2.0848592  | -0.3745888 | 3.9657940  |
| C | 1.9544587  | -2.0766106 | 5.5950106  |
| H | 2.9242307  | -1.8221779 | 6.0325010  |
| H | 1.8134778  | -3.1559274 | 5.6269869  |
| H | 1.1553473  | -1.5849118 | 6.1526712  |
| C | 4.6826519  | 1.6905439  | 2.1540468  |
| H | 5.0073520  | 2.7192826  | 2.2974666  |
| H | 5.5026701  | 1.0588926  | 2.5033451  |
| C | 2.5678108  | 3.7839632  | 2.9179278  |
| H | 3.6099348  | 4.0854389  | 2.8325001  |
| H | 2.1435666  | 4.3749563  | 3.7328760  |
| C | 3.8373971  | 3.8330877  | 0.1204176  |
| H | 4.4282397  | 4.1455034  | 0.9792794  |
| H | 4.1488711  | 4.4672788  | -0.7127754 |
| H | 0.9053668  | -1.1607341 | -2.1190472 |
| H | 1.5194304  | -0.8428796 | -3.7261428 |
| H | 4.8160424  | -2.5943571 | 0.2311879  |
| H | 4.4390657  | -3.5427345 | -1.2056902 |
| N | -0.6760175 | -0.5682156 | -0.3165929 |
| C | 0.1484325  | 0.1248713  | 0.0694185  |
| C | 1.1740874  | 0.9874455  | 0.5493680  |
| H | 1.9006739  | 1.1691716  | -0.2444270 |
| H | 0.7367417  | 1.9366322  | 0.8634712  |
| H | 1.6759486  | 0.5217799  | 1.3992087  |

## 2. Experimental procedure and characterisation

### Synthetic procedure for 2.

A solution of PPTS (0.64 g, 0.026 mol) dissolved in CH<sub>2</sub>Cl<sub>2</sub> (10 mL) was added in one portion to a stirred solution of **1** (6.9 g, 0.026 mol) and DHP (3.22 g, 0.038 mol) in THF (100 mL) at room temperature. The solution was stirred overnight at room temperature. The solvent was then evaporated under reduced pressure, and the residue was extracted with diethyl ether. The organic layer was washed twice with brine and then dried over sodium sulfate. The solvent was evaporated under reduced pressure to leave a residue, which was purified by chromatography (Et<sub>2</sub>O/pentane: 50/50). Evaporation of the solvent gave compound **2** as a white crystalline material (7.74 g, 84%).

**<sup>1</sup>H NMR** (300 MHz, CDCl<sub>3</sub>) δ 7.00 (d, 1H, Ar), 6.93 – 6.88 (m, 2H, Ar), 4.74 (d, 1H, propargyl-CH<sub>2</sub>), 4.72 (d, 1H, -CH<sub>2</sub>-OTHP), 4.68 (m, 1H, THP), 4.44 (d, 1H, -CH<sub>2</sub>-OTHP), 3.92 (m, 1H, THP), 3.87 (s, 3H, OCH<sub>3</sub>), 3.54 (m, 1H, THP), 2.49 (t, 1H, propargyl-CH), 1.90 -1.48 (m, 6H, THP); **<sup>13</sup>C NMR** (75 MHz, CDCl<sub>3</sub>) 149.8, 146.3, 132.4, 120.3, 114.4, 111.9, 97.7, 75.8, 68.8, 62.4, 56.9, 56.0, 30.7, 25.6, 19.8. HRMS (ESI): Calcd for C<sub>11</sub>H<sub>12</sub>O<sub>3</sub> [M+H]<sup>+</sup>: 294.1700, found 294.1700.

## Synthetic procedure for 4.

Compound **3** (200 mg, 0.87 mmol), was dissolved in DMF (20 mL). Then NaN<sub>3</sub> (73.5 mg, 1.3 equiv.) was added in small portion. The reaction was stirred at room temperature for 16h. The solution was then washed twice with brine and dried over sodium sulfate. The solvent was evaporated under reduced pressure to give a residue, which was purified by column chromatography on silica gel (164 mg, 98%). **<sup>1</sup>H NMR** (400 MHz, CDCl<sub>3</sub>) δ 8.08(d, 1H), 7.89(t, 1H), 7.59 (d, 1H), 4.64(s, 2H), 4.01(s, 3H). **<sup>13</sup>C NMR** (400 MHz, CDCl<sub>3</sub>) 165.65, 158.42, 147.83, 138.17, 125.56, 121.53, 55.7, 51.4. **HRMS (ESI)**: Calcd for C<sub>8</sub>H<sub>8</sub>N<sub>4</sub>O<sub>2</sub> [M+H]<sup>+</sup> : 193.0720, found 193.0722.

## Synthetic procedure for 5.

Compounds **2** (276 mg, 1 mmol) and **4** (192 mg, 1.02 mmol) were dissolved in a 1:1 CHCl<sub>3</sub>:CH<sub>3</sub>CN solvent mixture (30 mL). CuSO<sub>4</sub>·5H<sub>2</sub>O (22.5 mg, 0.09 mmol) and sodium ascorbate (30 mg, 0.1 mmol) were then added and the solution was stirred at room temperature for 24 h. The resulting precipitate was then filtrated and the filtrate concentrated under reduced pressure. The residue was dissolved in CHCl<sub>3</sub> (40 mL) and the resulting solution washed with water (2 X 20mL) and brine (20 mL), before to be dried using Na<sub>2</sub>SO<sub>4</sub>. The solvent was evaporated under reduce pressure and the resulting solid was purified by column chromatography (CH<sub>2</sub>Cl<sub>2</sub>/MeOH=50:1) to give **5** as a white solid (390 mg, 83%). **<sup>1</sup>H NMR** (CDCl<sub>3</sub>, 400 MHz): δ 8.06 (d, 1H, pyridine), 7.82 (t, 1H, pyridine), 7.78 (s, 1H, Triazole-H), 7.25 (d, 1H, pyridine), 6.99 – 6.83 (m, 3H, Ar), 5.74 (s, 2H, Pyridine-CH<sub>2</sub>), 5.26 (s, 2H, ArO-CH<sub>2</sub>), 4.64 (d, 1H, -CH<sub>2</sub>-OTHP), 4.62 (m, 1H, THP), 4.40 (d, 1H, -CH<sub>2</sub>-OTHP), 4.00 (s, 3H, COOCH<sub>3</sub>), 3.90 (m, 1H, THP), 3.82 (s, 3H, Ar-OMe), 3.52 (m, 1H, THP), 1.87-1.49 (m, 6H, THP). **<sup>13</sup>C NMR** (75 MHz, CDCl<sub>3</sub>): δ 165.2, 155.2, 149.7, 148.0, 147.1, 145.1, 138.6, 132.1, 125.6, 124.9, 123.6, 120.5, 114.3, 111.9, 97.8, 68.8, 63.4, 62.4, 55.9, 55.7, 53.17, 30.7, 25.5, 19.5 ppm. **HRMS (ESI)**: Calcd for C<sub>24</sub>H<sub>28</sub>N<sub>4</sub>O<sub>6</sub> [M+H]<sup>+</sup> : 469.2082, found 469.2080.

## Synthetic procedure for 6.

NaBH<sub>4</sub> (360 mg, 9.52 mmol) was added to a suspension of **5** (230mg, 0.49 mmol) in anhydrous EtOH (8 mL) at 0°C. The reaction mixture was then refluxed for 2 h and the solvent was removed under reduced pressure. The resulting crude residue was dissolved in CH<sub>2</sub>Cl<sub>2</sub> (10 mL), washed with brine (2X10 mL), and with an aqueous saturated Na<sub>2</sub>CO<sub>3</sub> solution (2 mL). The organic layer was dried with Na<sub>2</sub>SO<sub>4</sub> and concentrated. Recrystallization from CH<sub>2</sub>Cl<sub>2</sub>/Et<sub>2</sub>O (1:1) yielded compound **6** (177 mg, 82%) as a white solid. **<sup>1</sup>H NMR** (300 MHz, CDCl<sub>3</sub>) δ 7.75(s, 1H, triazole), 7.66(t, 1H, pyridine), 7.23(d, 1H, pyridine), 6.98-6.83(m, 3H, Ar), 5.63(s, 2H, pyridine-CH<sub>2</sub>), 5.27(s, 2H, ArO-CH<sub>2</sub>), 4.70 (d, 1H, -CH<sub>2</sub>-OTHP), 4.68 (m, 1H, THP), 4.42(d, 1H, -CH<sub>2</sub>-OTHP), 3.91(m, 1H, THP), 3.84(s, 3H, OMe), 3.56(m, 1H, THP), 1.90-1.50(m, 6H, THP). **<sup>13</sup>C NMR** (75 MHz, CDCl<sub>3</sub>) δ 159.7, 153.4, 149.7, 147.1, 144.9, 138.1, 132.0, 123.6, 121.0, 120.6, 120.3, 114.3, 111.9, 97.9, 68.9, 64.1, 63.4, 62.5, 56.0, 55.5, 30.7, 25.6, 19.6. **HRMS (ESI)**: Calcd for C<sub>23</sub>H<sub>28</sub>N<sub>4</sub>O<sub>5</sub> [M+H]<sup>+</sup> : 441.2132, found 441.2127.

## Synthetic procedure for 7.

A solution of MsCl (233 mg, 2.1 mmol) in CH<sub>2</sub>Cl<sub>2</sub> (10 mL) was added slowly, at 0°C, to a stirred solution of **6** (850 mg, 2.0 mmol) and Et<sub>3</sub>N (3 mL) in CH<sub>2</sub>Cl<sub>2</sub> (100 mL). The solution was stirred overnight at room temperature. The solvent was then evaporated under reduced pressure, and the residue was extracted with CH<sub>2</sub>Cl<sub>2</sub>. The organic layers were combined and washed twice with brine and then dried over sodium sulfate. The solvent was evaporated under reduced pressure to give a yellow residue, which was purified by chromatography (Et<sub>2</sub>O/pentane: 50/50) to yield **7** as a yellow oil (809 mg, 78% yield). **<sup>1</sup>H NMR** (300 MHz, CDCl<sub>3</sub>) δ 7.78(s, 1H, triazole), 7.74(t, 1H, pyridine), 7.42(d, 1H, pyridine), 7.15(d, 1H, pyridine), 7.16-6.84 (m, 3H, Ar), 5.62(s, 2H, pyridine-CH<sub>2</sub>), 5.27(s, 2H, ArO-CH<sub>2</sub>), 4.70 (d, 1H, -CH<sub>2</sub>-OTHP), 4.67 (m, 1H, THP), 4.42(d, 1H, -CH<sub>2</sub>-OTHP), 3.91(m, 1H, THP), 3.85(s, 3H, OMe), 3.54(m, 1H, THP), 3.04(s, 3H, OMs), 1.90-1.50(m, 6H). **<sup>13</sup>C NMR** (75 MHz, CDCl<sub>3</sub>) δ 154.5, 154.1, 149.7, 147.1, 144.9, 138.4, 132.1, 123.7, 122.3, 122.1, 120.6, 114.2, 111.9, 97.9, 71.1, 68.9, 63.4, 62.5, 56.0, 55.20, 38.2, 30.7, 25.6, 19.6. **HRMS (ESI)**: Calcd for C<sub>24</sub>H<sub>30</sub>N<sub>4</sub>O<sub>7</sub>S [M+H]<sup>+</sup>: 519.1908, found 519.1909.

## Synthetic procedure for 8.

In a 100 mL round-bottom flask, **7** (267 mg, 0.516 mmol) was dissolved in THF (22 mL). Then NH<sub>3</sub> gas was bubbled slowly for an hour. Then Cs<sub>2</sub>CO<sub>3</sub> (757 mg, 2.32 mmol) was added in one portion. The reaction was stirred at 90 °C for 3 days. The mixture was then cooled to rt, and THF was removed under vacuum. Then 300 mL of CH<sub>2</sub>Cl<sub>2</sub> and 300 mL of H<sub>2</sub>O were added. After thoroughly mixing, the organic layer was separated, and the aqueous phase was extracted with CH<sub>2</sub>Cl<sub>2</sub> (2 × 100 mL). The combined organic layers were dried over Na<sub>2</sub>SO<sub>4</sub>, and the organic solvent was removed under vacuum. The crude product was purified by column chromatography on silica gel with a 25:1 mixture of CH<sub>2</sub>Cl<sub>2</sub>:MeOH as eluent to give hemicryptophane precursor **8** as a white oil (493 mg, 73 % yield). **<sup>1</sup>H NMR** (300 MHz, CDCl<sub>3</sub>) δ 7.75(s, 1H), 7.67(t, 1H), 7.24(d, 1H), 7.05(d, 1H), 6.99-6.84(m, 3H), 5.64(s, 2H), 5.29(s, 2H), 4.74-4.67(m, 4H), 4.43(d, 1H), 3.92(m, 1H), 3.85(s, 3H), 3.53(m, 1H), 1.91-1.51(m, 6H). **<sup>13</sup>C NMR** (75 MHz, CDCl<sub>3</sub>) δ 159.6, 153.4, 149.7, 147.1, 145.0, 138.1, 132.0, 123.6, 120.9, 120.6, 120.3, 114.3, 111.9, 97.9, 77.5, 77.1, 76.7, 68.9, 64.0, 63.4, 62.5, 56.0, 55.5, 30.7, 25.6, 19.6. **HRMS (ESI)**: Calcd for C<sub>69</sub>H<sub>81</sub>N<sub>13</sub>O<sub>12</sub> [M+Na]<sup>+</sup>: 1306.6020, found 1306.6012.

## Synthetic procedure for cage Hm-TriA-TPA.

A solution of hemicryptophane precursor **8** (257 mg, 0.2 mol) in CH<sub>3</sub>CN (18 mL) was added dropwise (4 h) under argon at 70°C to a solution of Sc(OTf)<sub>3</sub> (125 mg, 0.28 mol) in CH<sub>3</sub>CN (50 mL). The mixture was stirred under argon at 70°C for 24 h. The solvent was then evaporated. The crude product was purified by column chromatography on silica gel with 25:1 mixture of CH<sub>2</sub>Cl<sub>2</sub>:MeOH (with 3 drops of triethylamine) as eluent to give cage **Hm-TriA-TPA** as a white solid (57 mg, 29% yield). **<sup>1</sup>H NMR** (300 MHz, CDCl<sub>3</sub>) δ 7.62(s, 3H), 7.14(t, 3H), 7.04(d, 3H), 6.81(s, 3H), 6.74(d, 3H), 6.58(s, 3H), 5.67(d, 3H), 5.46(d, 3H), 5.37(d, 3H), 5.20(d, 3H), 4.69(d, 3H), 3.66(s, 9H), 3.47(d, 3H), 3.45(d, 3H), 3.12(d, 3H). **<sup>13</sup>C NMR** (75 MHz, CDCl<sub>3</sub>) δ 159.20, 153.01, 147.85,

146.06, 145.28, 137.35, 132.78, 131.85, 123.45, 123.27, 120.28, 114.85, 113.60, 77.33, 77.01, 76.69, 63.24, 58.61, 56.37, 55.34, 36.57. **HRMS (ESI)**: Calcd for C<sub>54</sub>H<sub>51</sub>N<sub>13</sub>O<sub>6</sub> [M+H]<sup>+</sup> : 978.4164, found 978.4156.

For <sup>1</sup>H NMR; <sup>13</sup>C NMR and 2D-NMR spectra, see supplementary figures S2, S3 and S4-5 respectively.

### **Synthetic procedure for Zn<sup>II</sup>(Hm-TriA-TPA)(OTf)<sub>2</sub>.**

A solution of Zn<sup>II</sup>(OTf)<sub>2</sub> (6.7 mg, 18,4 μmol, 1.0 equiv.) in CH<sub>3</sub>CN (1 mL) was added, at room temperature, to a stirred solution of **Hm-TriA-TPA** (18 mg, 18,4 μmol, 1.0 equiv.) in CH<sub>3</sub>CN (2 mL). The resulting white solution was stirred at room temperature for 1 hour and an excess of Et<sub>2</sub>O was added. A white precipitate was formed, isolated by filtration, washed with Et<sub>2</sub>O, and dried in vacuo to give **Zn<sup>II</sup>(Hm-TriA-TBTA)(OTf)<sub>2</sub>** in a 80% yield. <sup>1</sup>H NMR (400 MHz, Acetonitrile-*d*<sub>3</sub>) δ 8.03 (t, 3H), 7.79 (s, 3H), 7.49 (d, 3H), 7.15 (d, 3H), 7.08 (s, 1H), 6.92 (s, 1H), 5.65 (d, 3H), 5.53 (d, 3H), 5.30 (d, 3H), 5.14 (d, 3H), 4.65 (d, 3H), 4.42 (d, 3H), 4.15 (d, 3H), 3.80 (s, 9H), 3.49 (d, 3H). **HRMS (ESI)**: Calcd for C<sub>54</sub>H<sub>51</sub>ZnN<sub>13</sub>O<sub>6</sub> [M]<sup>2+</sup>: 520.6683 Found: 520.6682 (figure S15).

### **Synthetic procedure for Cu<sup>II</sup>(Hm-TriA-TPA)(OTf)<sub>2</sub>.**

To a stirred solution of Cu<sup>II</sup>(OTf)<sub>2</sub> (7.4 mg, 20 μmol, 1.0 equiv.) in CH<sub>3</sub>CN (1.0 mL), was added, at room temperature, a solution of **Hm-TriA-TPA** (20 mg, 20 μmol, 1.0 equiv.) in CH<sub>3</sub>CN (2.0 mL). The resulting deep blue solution was stirred at room temperature for one additional hour and an excess of Et<sub>2</sub>O was added. A blue precipitate was formed, isolated by filtration, washed with Et<sub>2</sub>O, and dried in vacuo to give **Cu<sup>II</sup>(Hm-TriA-TBTA)(OTf)<sub>2</sub>** in a 74% yield. Single crystals suitable for X-ray diffraction were obtained by slow diffusion of diethyl ether to a CH<sub>3</sub>CN solution of **Cu<sup>II</sup>(Hm-TriA-TBTA)(OTf)<sub>2</sub>**. **HRMS (ESI)**: Calcd for C<sub>54</sub>H<sub>51</sub>CuN<sub>13</sub>O<sub>6</sub> [M]<sup>2+</sup>: 520.1685 Found: 520.1684 (figure S8). For UV-vis spectra, see supplementary figure S9.

### **Preparation of the azido complexes Cu<sup>II</sup>(L)(OTf)(N<sub>3</sub>) (L= Me<sup>3</sup>TPA or Hm-TriA-TPA).**

Azido complexes were obtained, according to reported protocols,<sup>[S9]</sup> through the addition of NaN<sub>3</sub> (1.7 mg, 26 μmol, 1.2 equiv.) to a stirred solution of the desired **Cu<sup>II</sup>(L)(OTf)<sub>2</sub>** complex (L= Me<sup>3</sup>PTA or **Hm-TriA-TPA**, 22 μmol) in acetone. The mixture was sonicated and stirred one hour at room temperature to afford a green solution. An excess of Et<sub>2</sub>O was then added to form a green precipitate which was isolated by filtration, washed with Et<sub>2</sub>O and dried in vacuo to give the azido complexes **Cu<sup>II</sup>(L)(OTf)(N<sub>3</sub>)**, which were further characterized by UV-vis (Figure S10) and IR (Figure S11 and S13) spectroscopies.

## Single crystal X-ray Diffraction Data

- **Hm-TriA-TPA** (CCDC 2153939)

Single crystals of  $C_{60}H_{66}N_{13}O_{7.5}$  (**Hm-TriA-TPA**·( $Et_2O$ )<sub>1.5</sub>) were crystallized by slow diffusion of  $Et_2O$  in a  $CH_2Cl_2$  solution of the compound. A suitable crystal was selected and mounted on a SuperNova, Dual, Cu at home/near, AtlasS2 diffractometer. The crystal was kept at 203.00(10) K during data collection. Using Olex2, <sup>[S10]</sup> the structure was solved with the Unknown, <sup>[S11]</sup> structure solution program using Unknown and refined with the ShelXL, <sup>[S12]</sup> refinement package using Least Squares minimisation.

|                                                |                                                                |
|------------------------------------------------|----------------------------------------------------------------|
| Empirical formula                              | $C_{60}H_{66}N_{13}O_{7.5}$                                    |
| Formula weight                                 | 1089.25                                                        |
| Temperature/K                                  | 203.00(10)                                                     |
| Crystal system                                 | triclinic                                                      |
| Space group                                    | P-1                                                            |
| a/Å                                            | 9.7425(2)                                                      |
| b/Å                                            | 15.3879(3)                                                     |
| c/Å                                            | 20.5147(5)                                                     |
| $\alpha/^\circ$                                | 106.615(2)                                                     |
| $\beta/^\circ$                                 | 95.925(2)                                                      |
| $\gamma/^\circ$                                | 102.708(2)                                                     |
| Volume/Å <sup>3</sup>                          | 2829.13(11)                                                    |
| Z                                              | 2                                                              |
| $\rho_{calc}/cm^3$                             | 1.279                                                          |
| $\mu/mm^{-1}$                                  | 0.705                                                          |
| F(000)                                         | 1154.0                                                         |
| Crystal size/mm <sup>3</sup>                   | 0.28 × 0.26 × 0.03                                             |
| Radiation                                      | CuK $\alpha$ ( $\lambda$ = 1.54184)                            |
| 2 $\theta$ range for data collection/ $^\circ$ | 6.21 to 143.802                                                |
| Index ranges                                   | -11 ≤ h ≤ 11, -18 ≤ k ≤ 18, -25 ≤ l ≤ 25                       |
| Reflections collected                          | 47874                                                          |
| Independent reflections                        | 10823 [R <sub>int</sub> = 0.0514, R <sub>sigma</sub> = 0.0350] |
| Data/restraints/parameters                     | 10823/25/746                                                   |
| Goodness-of-fit on F <sup>2</sup>              | 1.037                                                          |
| Final R indexes [ $I \geq 2\sigma(I)$ ]        | R1 = 0.0592, wR2 = 0.1529                                      |
| Final R indexes [all data]                     | R1 = 0.0863, wR2 = 0.1726                                      |
| Largest diff. peak/hole / e Å <sup>-3</sup>    | 0.58/-0.44                                                     |

- **Cu<sup>II</sup>(Hm-TriA-TPA)(OTf)<sub>2</sub>** (CCDC 2154000)

Single crystals of C<sub>174</sub>H<sub>162</sub>Cu<sub>3</sub>F<sub>18</sub>N<sub>42</sub>O<sub>36</sub>S<sub>6</sub> [**Cu<sup>II</sup>(Hm-TriA-TPA)(OTf)<sub>2</sub>(CH<sub>3</sub>CN)**]<sub>3</sub> were crystallized by slow diffusion of Et<sub>2</sub>O in a CH<sub>3</sub>CN solution of the compound. A suitable crystal was selected and mounted on a SuperNova, Dual, Cu at home/near, AtlasS2 diffractometer. The crystal was kept at 203.01(10) K during data collection. Using Olex2, <sup>[S10]</sup> the structure was solved with the Unknown, <sup>[S11]</sup> structure solution program using Unknown and refined with the ShelXL, <sup>[S12]</sup> refinement package using Least Squares minimisation.

|                                             |                                                                                                                  |
|---------------------------------------------|------------------------------------------------------------------------------------------------------------------|
| Empirical formula                           | C <sub>174</sub> H <sub>162</sub> Cu <sub>3</sub> F <sub>18</sub> N <sub>42</sub> O <sub>36</sub> S <sub>6</sub> |
| Formula weight                              | 4142.43                                                                                                          |
| Temperature/K                               | 203.01(10)                                                                                                       |
| Crystal system                              | triclinic                                                                                                        |
| Space group                                 | P-1                                                                                                              |
| a/Å                                         | 13.81820(10)                                                                                                     |
| b/Å                                         | 24.6077(3)                                                                                                       |
| c/Å                                         | 34.2051(4)                                                                                                       |
| α/°                                         | 87.5100(10)                                                                                                      |
| β/°                                         | 86.7650(10)                                                                                                      |
| γ/°                                         | 81.9360(10)                                                                                                      |
| Volume/Å <sup>3</sup>                       | 11490.1(2)                                                                                                       |
| Z                                           | 2                                                                                                                |
| ρ <sub>calc</sub> /cm <sup>3</sup>          | 1.197                                                                                                            |
| μ/mm <sup>-1</sup>                          | 1.552                                                                                                            |
| F(000)                                      | 4266.0                                                                                                           |
| Crystal size/mm <sup>3</sup>                | 0.32 × 0.22 × 0.18                                                                                               |
| Radiation                                   | CuKα (λ = 1.54184)                                                                                               |
| 2θ range for data collection/°              | 6.432 to 142.378                                                                                                 |
| Index ranges                                | -16 ≤ h ≤ 16, -29 ≤ k ≤ 30, -40 ≤ l ≤ 41                                                                         |
| Reflections collected                       | 196803                                                                                                           |
| Independent reflections                     | 43691 [R <sub>int</sub> = 0.1055, R <sub>sigma</sub> = 0.0558]                                                   |
| Data/restraints/parameters                  | 43691/210/2611                                                                                                   |
| Goodness-of-fit on F <sup>2</sup>           | 1.065                                                                                                            |
| Final R indexes [I ≥ 2σ (I)]                | R1 = 0.0564, wR2 = 0.1576                                                                                        |
| Final R indexes [all data]                  | R1 = 0.0696, wR2 = 0.1680                                                                                        |
| Largest diff. peak/hole / e Å <sup>-3</sup> | 0.49/-0.61                                                                                                       |

### 3. Supplementary figures.

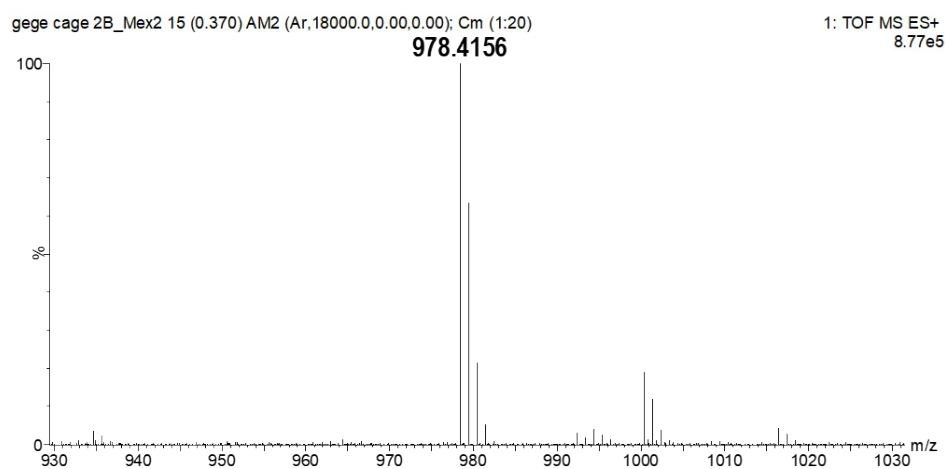

**Figure S1.** ESI-HRMS spectra of **Hm-TriA-TPA** in  $\text{CH}_2\text{Cl}_2$  along with the zoom on the isotopic pattern at  $m/z = 978.4156$  that can be attributed to **Hm-TBTA.H<sup>+</sup>** ( $m/z_{\text{calculated}} = 978.4158$ ).

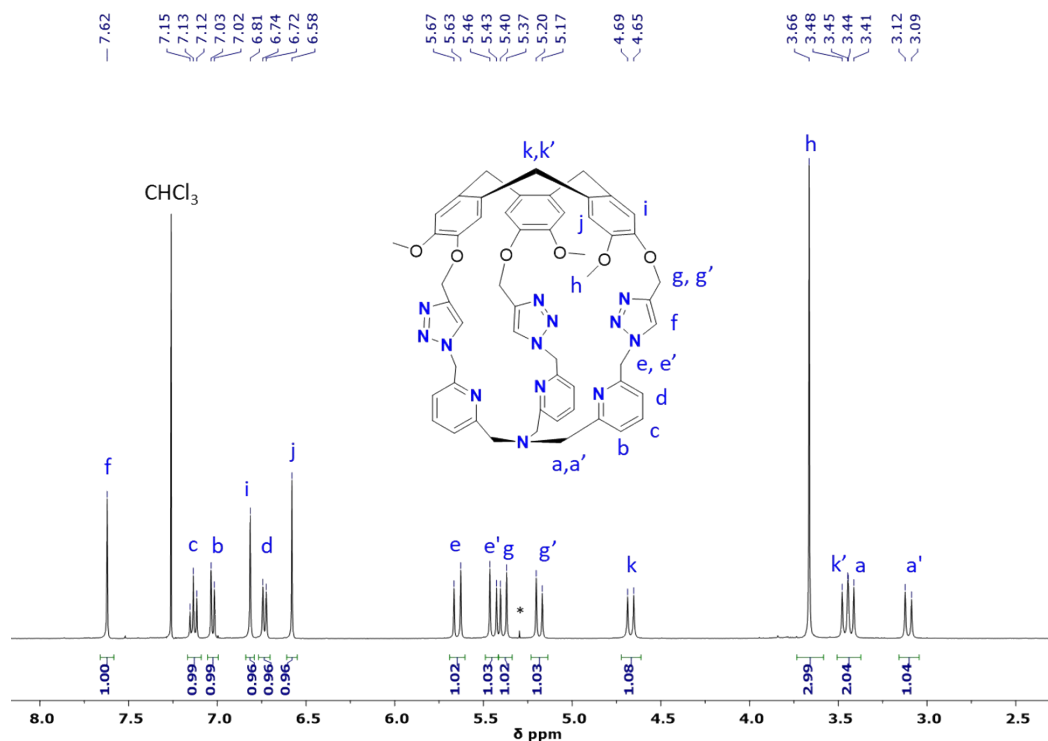

**Figure S2.**  $^1\text{H}$ -NMR spectra ( $\text{CDCl}_3$ , 400 MHz) of **Hm-TriA-TPA**, at 298K (\*= $\text{CH}_2\text{Cl}_2$ ).

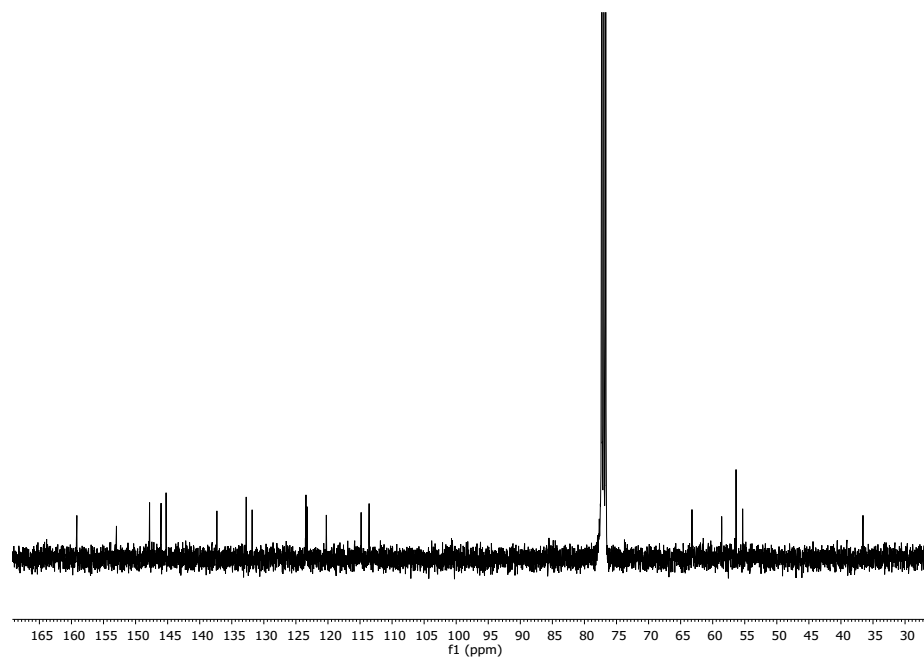

**Figure S3.**  $^{13}\text{C}$ -NMR spectra ( $\text{CDCl}_3$ , 400 MHz) of **Hm-TriA-TPA**, at 298K.

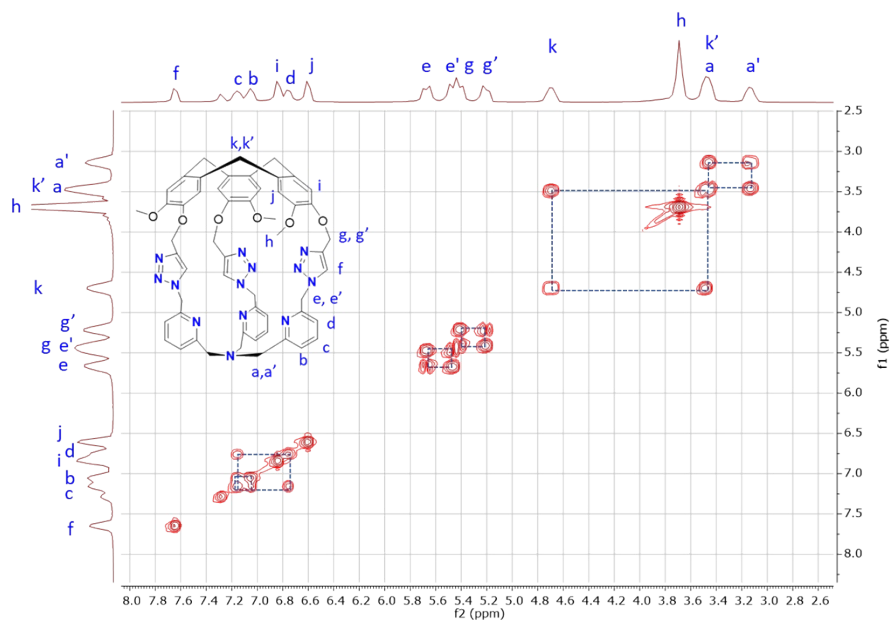

**Figure S4.** 2D COSY-NMR spectra ( $\text{CDCl}_3$ , 400MHz) of **Hm-TriA-TPA**, at 298K.



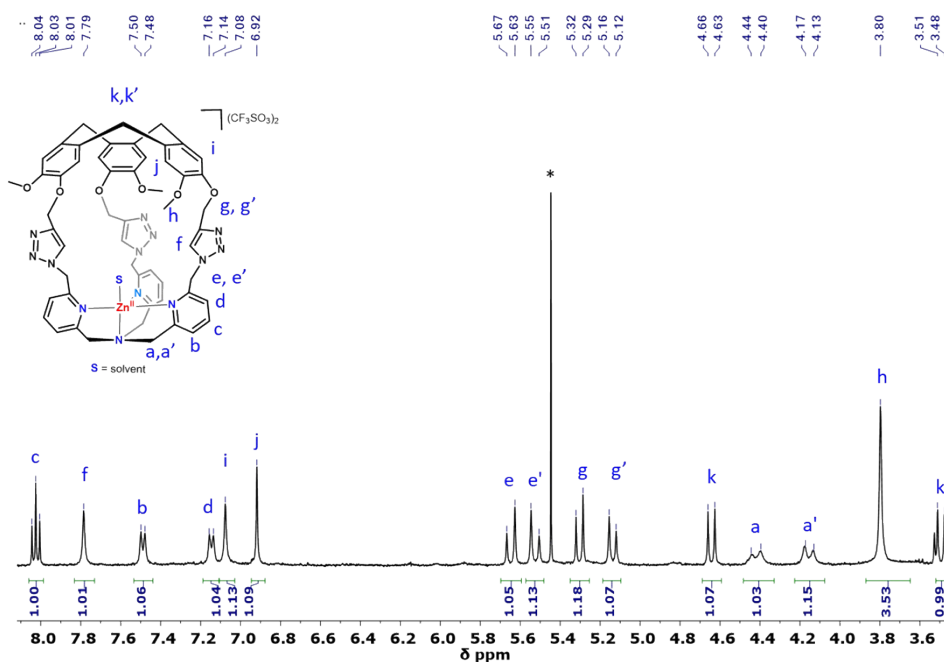

**Figure S6.**  $^1\text{H}$ -NMR spectra ( $\text{CD}_3\text{CN}$ , 400 MHz) of  $\text{Zn}^{\text{II}}(\text{Hm-TriA-TPA})(\text{OTf})_2$ , at 298K (\*= $\text{CH}_2\text{Cl}_2$ ). Isolated complex obtained upon precipitation with  $\text{Et}_2\text{O}$ .

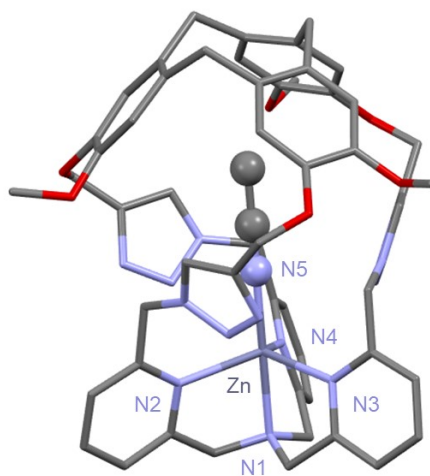

**Figure S7.** DFT-optimized structure (PBE0-D3/def2-TZVP, COSMO) of  $\text{Zn}^{\text{II}}(\text{Hm-TriA-TPA})(\text{CH}_3\text{CN})$  showing a distorted trigonal bipyramidal geometry. The trigonal plane comprises the three pyridines (N2, N3 and N4) with Zn-N distances of 2.222 Å. The coordination sphere is completed by the tertiary amine (N1) and one molecule of acetonitrile (N5) with respective Zn-N distances of 2.118 Å and 2.015 Å.

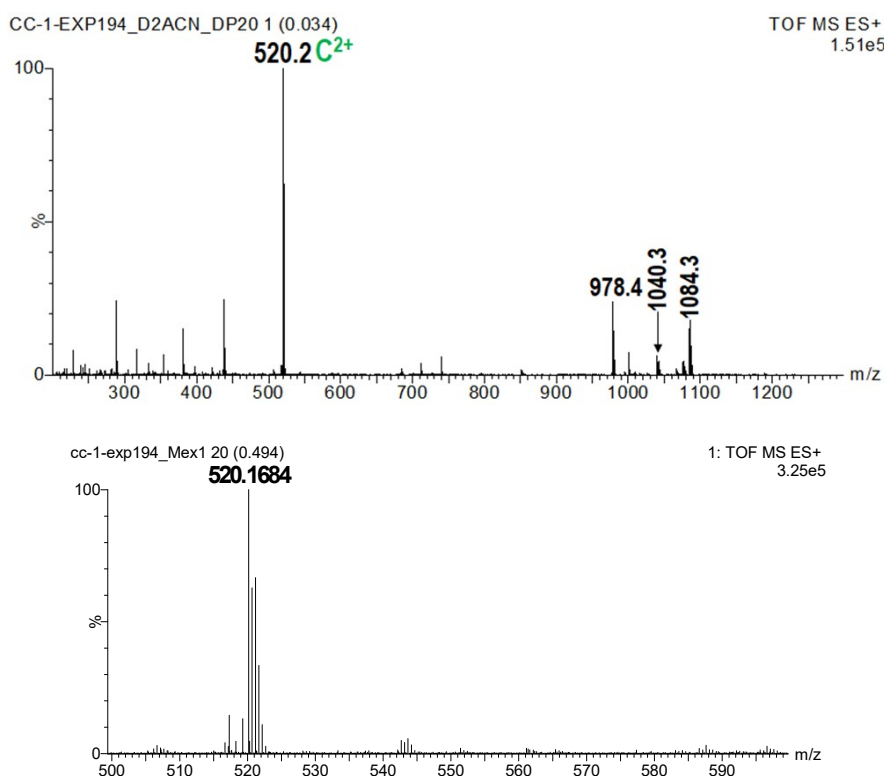

**Figure S8.** ESI-MS spectra of  $\text{Cu}^{\text{II}}(\text{Hm-TriA-TPA})(\text{OTf})_2$  in  $\text{CH}_3\text{CN}$  along with the zoom on the isotopic pattern at  $m/z$  = 520.1684 that can be attributed to  $\text{Cu}^{\text{II}}(\text{Hm-TriA-TPA})^{2+}$  ( $m/z$  calculated = 520.1685). Isotopic pattern at  $m/z$  = 978.4 could be attributed to the free ligand due to common partial metal-ion decomplexation in the condition of analysis (electrospray ionization).

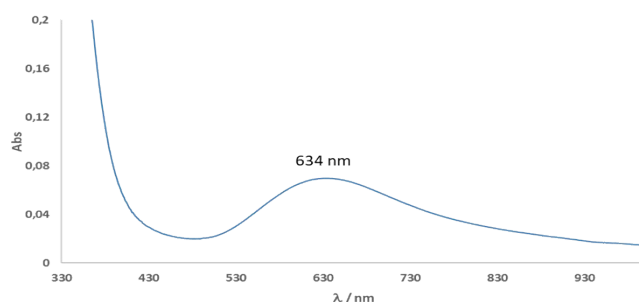

**Figure S9.** UV-vis spectra of  $\text{Cu}^{\text{II}}(\text{Hm-TriA-TPA})(\text{OTf})_2$  at 0,5 mM in acetone at 298K ( $\lambda_{\text{max}}$  = 634nm,  $\epsilon$  = 139  $\text{M}^{-1} \text{cm}^{-1}$ ).

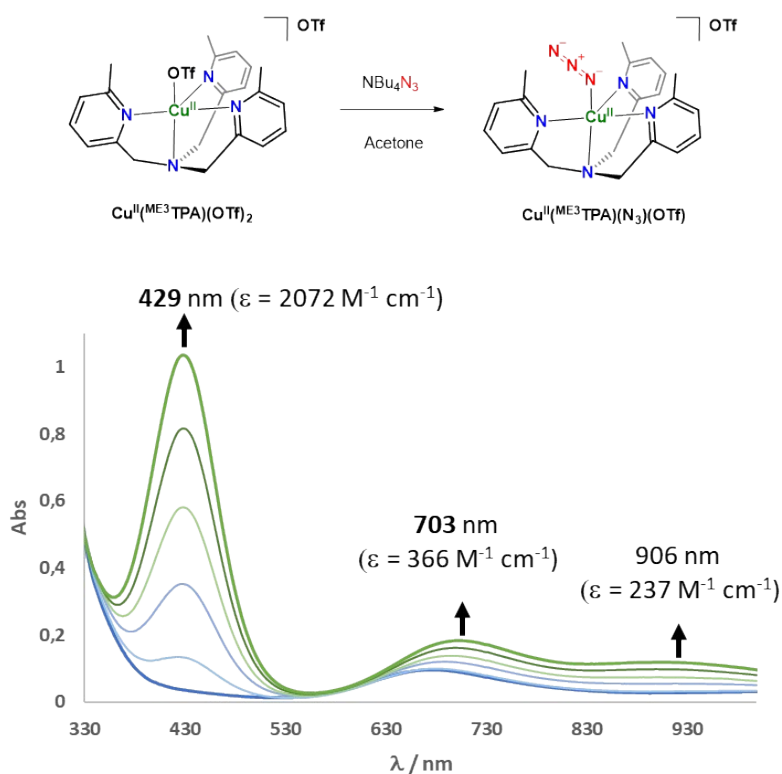

**Figure S10.** UV-vis monitoring of the addition of  $\text{NBu}_4\text{N}_3$  (0 to 1.0 equiv.) to a 0,5 mM solution of  $\text{Cu}^{\text{II}}(\text{Me}^3\text{TPA})(\text{OTf})_2$  in acetone at 298K ( $\lambda_{\text{max}} = 429\text{nm}$ ,  $\epsilon = 2072 \text{ M}^{-1} \text{ cm}^{-1}$ ).

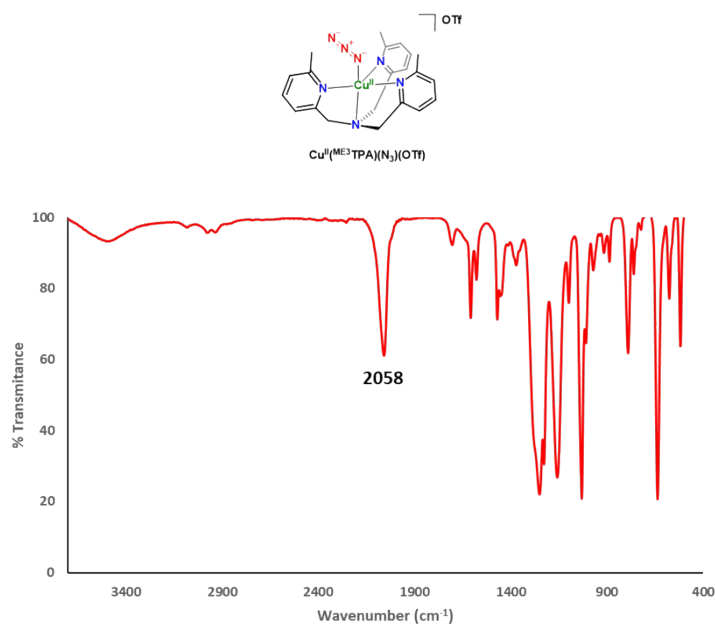

**Figure S11.** Infrared spectra of  $\text{Cu}^{\text{II}}(\text{Me}^3\text{TPA})(\text{N}_3)(\text{OTf})$ , the characteristic  $\text{N}\equiv\text{N}$  stretch is observed at  $2058 \text{ cm}^{-1}$ .

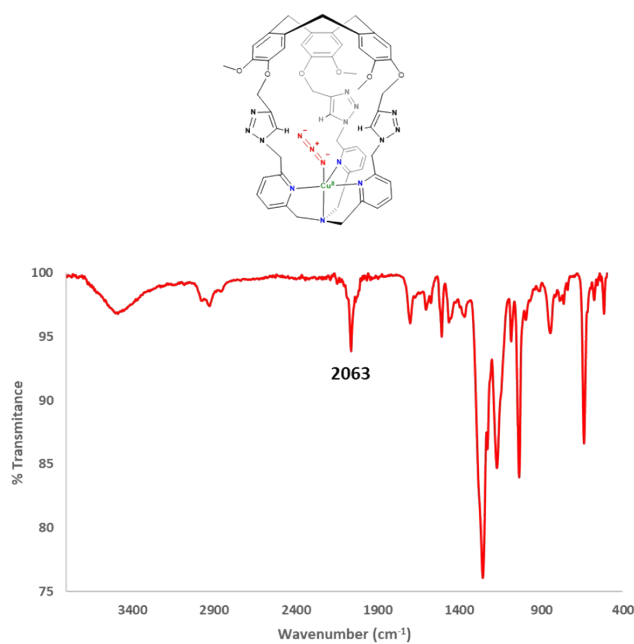

**Figure S12.** Infrared spectra of  $\text{Cu}^{\text{II}}(\text{Hm-TriA-TPA})(\text{OTf})(\text{N}_3)$ , the characteristic  $\text{N}\equiv\text{N}$  stretch is observed at 2063  $\text{cm}^{-1}$ .

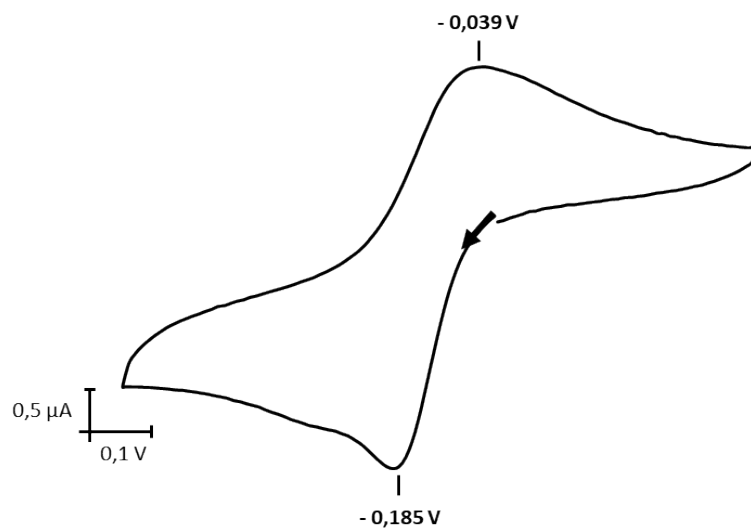

**Figure S13.** Cyclic voltammogram of  $\text{Cu}^{\text{II}}(\text{Hm-TriA-TPA})(\text{OTf})$  (-0.2 V to 0.8 V; 1.5 mM; 100  $\text{mV}\cdot\text{s}^{-1}$ ;  $\text{CH}_3\text{CN}$ ; 0.15 M  $\text{NBu}_4\text{PF}_6$ ; platinum WE  $\varnothing = 2\text{mm}$ ; E vs.  $\text{Fc}/\text{Fc}^+$ ).

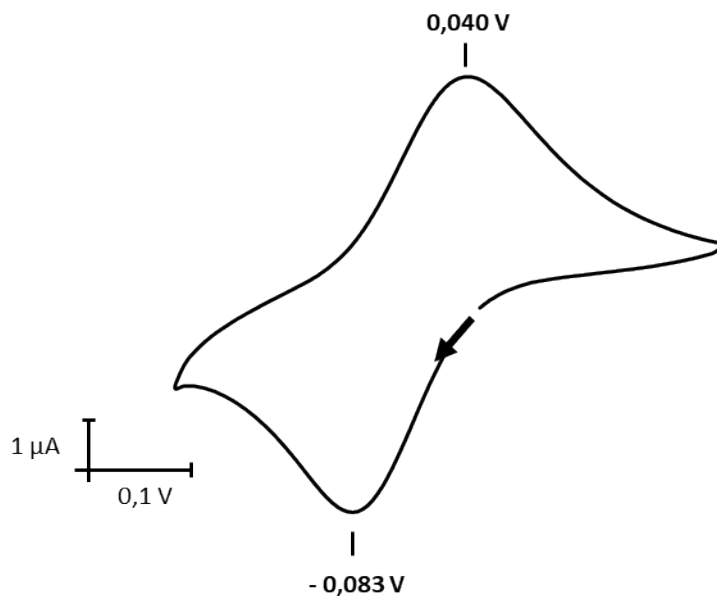

**Figure S14.** Cyclic voltammogram of  $\text{Cu}^{\text{II}}(\text{Me}_3\text{TPA})(\text{N}_3)(\text{OTf})$  (-0.2 V to 0.8 V; 2.5 mM; 100  $\text{mV}\cdot\text{s}^{-1}$ ;  $\text{CH}_3\text{CN}$ ; 0.25 M  $\text{NBu}_4\text{PF}_6$ ; platinum WE  $\phi = 2\text{mm}$ ; E vs.  $\text{Fc}/\text{Fc}^+$ ).

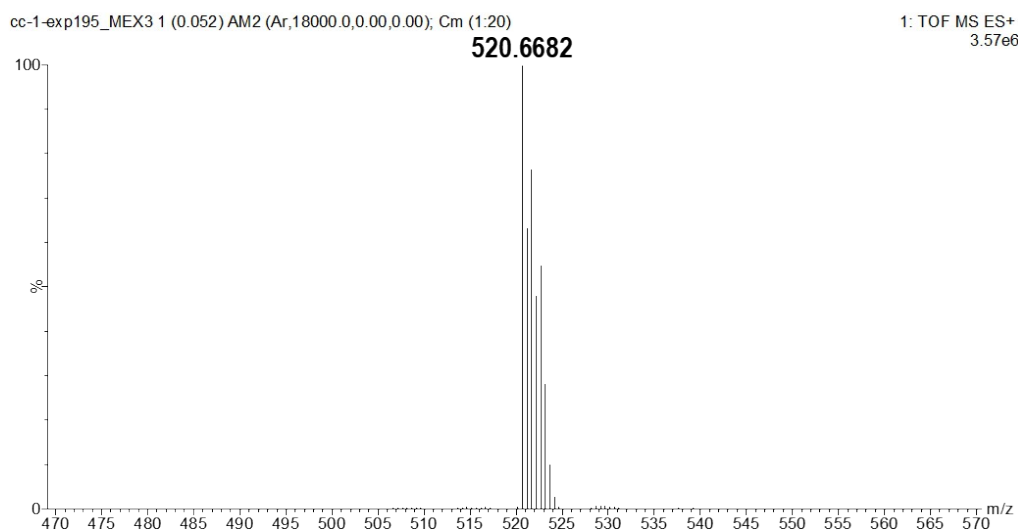

**Figure S15.** ESI-HRMS spectra of  $\text{Zn}^{\text{II}}(\text{Hm-TriA-TPA})(\text{OTf})_2$  in  $\text{CH}_3\text{CN}$ , the isotopic pattern at  $m/z = 520.6682$  can be attributed to  $\text{Zn}^{\text{II}}(\text{Hm-TriA-TPA})^{2+}$  ( $m/z_{\text{calculated}} = 520.6683$ ).

## 5. Supplementary references.

- [S1] G. E. Mulder, H. C. Q. van Ufford, J. van Ameijde, A. J. Brouwer, J. A. W. Kruijtzter and R. M. Liskamp, *Org. Biomol. Chem.* 2013, **11**, 2676-2684
- [S2] D. Zhang, B. Bousquet, J.-C. Mulatier, D. Pitrat, M. Jean, N. Vanthuyne, L. Guy, J.-P. Dutasta, and A. Martinez, *J. Org. Chem.* 2017, **82**, 7, 6082–6088
- [S3] H. Nagao, N. Komeda, M. Mukaida, M. Suzuki, and K. Tanaka, *Inorg. Chem.* 1996, **35**, 6809-6815
- [S4] TURBOMOLE V7.5 2020, a development of University of Karlsruhe and Forschungszentrum Karlsruhe GmbH, 1989-2007, TURBOMOLE GmbH, since 2007; available from <https://www.turbomole.org>.
- [S5] (a) Dirac, P.A.M., Proc. Royal Soc. (London) A 123 (1929), 714, (b) Slater, J.C., Phys. Rev. 81 (1951), 385., (c) Perdew, J.P., Wang, Y., Phys. Rev. B 45 (1992), 13244., (d) Perdew, J.P., Burke, K., Ernzerhof, M., Phys. Rev. Lett. 77 (1996), 3865., (e) Perdew, J.P., Ernzerhof, M., Burke, K., J. Chem. Phys. 105 (1996), 9982.
- [S6] Stefan Grimme, Jens Antony, Stephan Ehrlich, and Helge Krieg *J. Chem. Phys.* 132, 154104 (2010)
- [S7] (a) F. Weigend and R. Ahlrichs; *Phys. Chem. Chem. Phys.*, 7, 3297 (2005). (b) F. Weigend; *Phys. Chem. Chem. Phys.*, 8, 1057 (2006). (c) K. Eichkorn , F. Weigend , O. Treutler and R. Ahlrichs , *Theor. Chem. Acc.*, 1997, 97 , 119 —124
- [S8] A. Klamt, G. Schüürmann, *J. Chem. Soc., Perkin Trans. 2* (1993) 799-805.
- [S9] A. Wada, Y. Honda, S. Yamaguchi, S. Nagatomo, T. Kitagawa, K. Jitsukawa, and H. Masuda, *Inorg. Chem.* 2004, **43**, 5725-5735
- [S10] O. V. Dolomanov, L. J. Bourhis, R. J. Gildea, J. A. K. Howard, H. J. Puschmann, *Appl. Cryst.*, 2009, **42**, 339-341.
- [S11] G. M. Sheldrick, *Acta Cryst.*, 2008, **A64**, 112-122
- [S12] G. M. Sheldrick, *Acta Cryst.*, 2015, **C71**, 3-8.
